# Supplementary material for: Coronary Computed Tomography Angiography-Derived Fractional Flow Reserve in Patients with Anomalous Origin of the Right Coronary Artery from the Left Coronary Sinus
Source: PubMed Central journal article supplement — Korean J Radiol. 2019 Dec 16;21(2):192–202. doi: 10.3348/kjr.2019.0230 (PMC6992438; doi:10.3348/kjr.2019.0230), 2019-12-16
Supplement: kjr-21-192-s001.pdf [file kjr-21-192-s001.pdf]

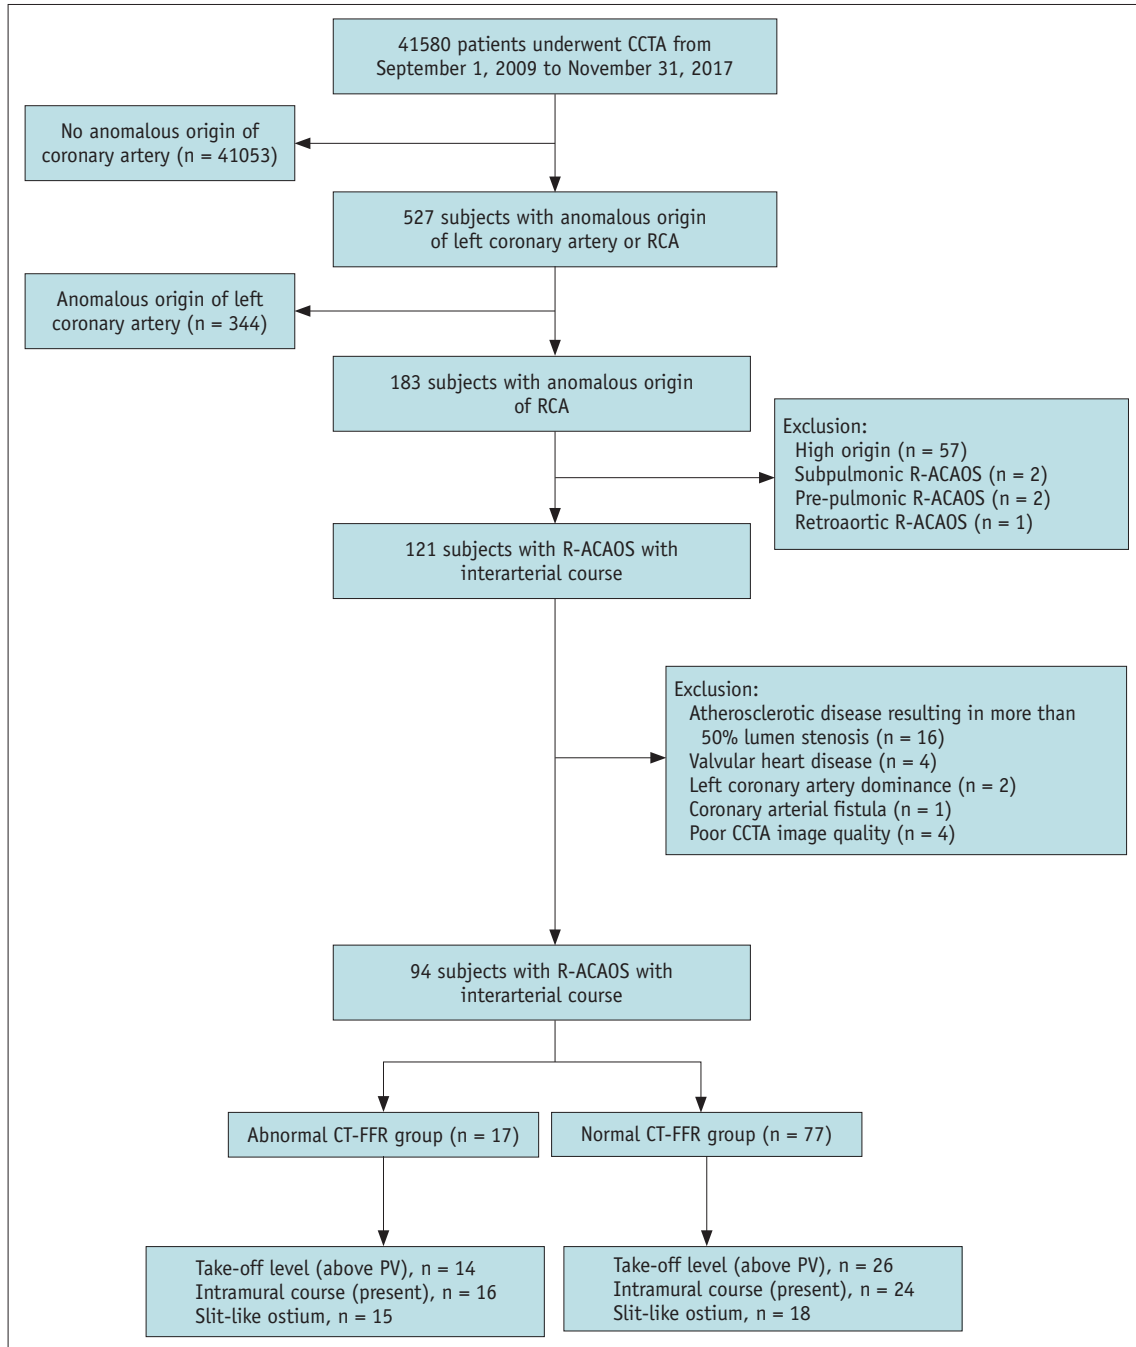

**Supplementary Fig. 1. Flowchart of study population.** CCTA = coronary computed tomographic angiography, CT-FFR = fractional flow reserve derived from computed tomographic angiography, PV = pulmonary valve, R-ACAOS = anomalous origin of RCA from left coronary sinus. RCA = right coronary artery
