# Supplementary material for: Coronary Computed Tomography Angiography-Derived Fractional Flow Reserve in Patients with Anomalous Origin of the Right Coronary Artery from the Left Coronary Sinus
Source: PubMed Central journal article supplement — Korean J Radiol. 2019 Dec 16;21(2):192–202. doi: 10.3348/kjr.2019.0230 (PMC6992438; doi:10.3348/kjr.2019.0230), 2019-12-16
Supplement: kjr-21-192-s003.pdf [file kjr-21-192-s003.pdf]

**Supplementary Table 1. Comparison of Different Models for Discrimination of Fractional Flow Reserve Derived from Computed Tomographic Angiography  $\leq 0.80$**

| Variables | Sen.             | Spec.            | Acc.             | AUC              |
|-----------|------------------|------------------|------------------|------------------|
| 1         | 0.82 (0.59–0.94) | 0.66 (0.55–0.76) | 0.69 (0.59–0.78) | 0.74 (0.62–0.87) |
| 2         | 0.82 (0.59–0.94) | 0.69 (0.58–0.78) | 0.71 (0.61–0.79) | 0.76 (0.63–0.88) |
| 3         | 0.88 (0.66–0.97) | 0.79 (0.69–0.87) | 0.81 (0.72–0.88) | 0.84 (0.73–0.94) |
| 1 + 2     | 0.82 (0.59–0.94) | 0.69 (0.58–0.78) | 0.71 (0.61–0.79) | 0.85 (0.77–0.94) |
| 1 + 3     | 0.88 (0.66–0.97) | 0.79 (0.69–0.87) | 0.81 (0.72–0.88) | 0.90 (0.83–0.96) |
| 2 + 3     | 0.88 (0.66–0.97) | 0.79 (0.69–0.87) | 0.81 (0.72–0.88) | 0.87 (0.78–0.96) |
| 1 + 2 + 3 | 0.88 (0.66–0.97) | 0.82 (0.72–0.89) | 0.83 (0.74–0.89) | 0.92 (0.86–0.98) |

Model 1: variable 1, take-off level (above pulmonary valve); Model 2: variable 2, intramural course (present); Model 3: variable 3, proximal vessel morphology (slit-like); Model 4: variables 1 + 2; Model 5: variables 1 + 3; Model 6: variables 2 + 3; Model 7: variables 1 + 2 + 3. Acc. = accuracy, AUC = area under curve, Sen. = sensitivity, Spec. = specificity
