# Supplementary figures and images for: Coronary Computed Tomography Angiography-Derived Fractional Flow Reserve in Patients with Anomalous Origin of the Right Coronary Artery from the Left Coronary Sinus
Source: PubMed Central journal article supplement — Korean J Radiol. 2019 Dec 16;21(2):192–202. doi: 10.3348/kjr.2019.0230 (PMC6992438; doi:10.3348/kjr.2019.0230), 2019-12-16

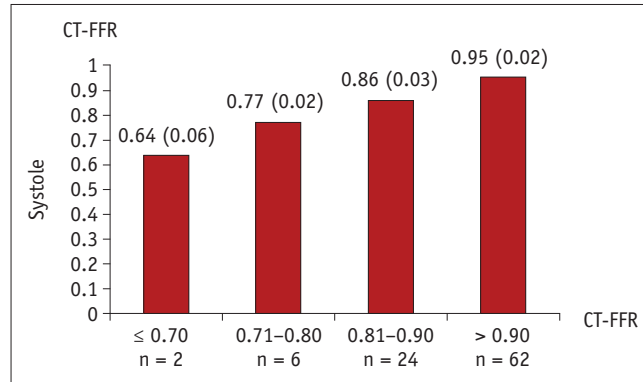

A

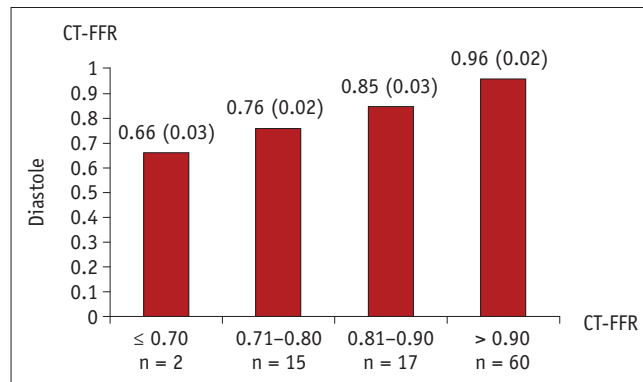

B

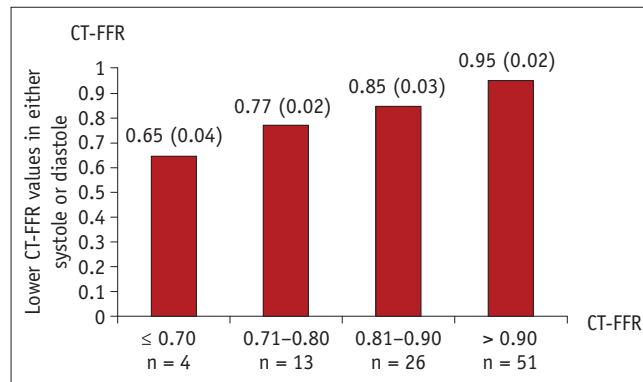

C

**Supplementary Fig. 2. Distribution of CT-FFR values for proximal RCA in this study.**

Supplement: kjr-21-192-s002.pdf [file kjr-21-192-s002.pdf]
